# Supplementary material for: Targeted next-generation sequencing of 21 candidate genes in hereditary ovarian cancer patients from the Republic of Bashkortostan
Source: Springer Nature journal article supplement (doi:10.1186/s13048-023-01119-z), 2023-04-04
Supplement: MOESM1 [file 25207718]

**Additional file 1.** List of primers to cover protein-coding and UTR regions selected for targeted NGS sequencing for the AmpSeq Illumina panel

| <b>Target ID</b> | <b>ULSO sequence</b>        | <b>DLSO sequence</b>       |
|------------------|-----------------------------|----------------------------|
| AMPL193028       | GAGAGAGGACAAGGAGAGGATTCTC   | TTCGAACTCAGGTGATTCTGGCCTC  |
| AMPL193027       | AAAGTACTGGGACATGAAGTTAAGG   | ATGCCTGTACTGAGTTTTGTGGGAT  |
| AMPL90450        | TTGGCTTTTGAGGCTATATCCACAG   | TCCTTGTGTTTCTACATGTTCTAC   |
| AMPL193029       | GAGGCCAACTCAGGTACCTGGATA    | ACTTTCTCTCATCAAGCTGACAT    |
| AMPL193026       | CGGCCAAAGCCACTCTCTAGGTTG    | AGAGAGAATGGAGGGAATCGGCAGC  |
| AMPL193022       | CCGGCCAGGAGATTTCAACCAAGCA   | AGTAAAGATTCTGCAGAACCCGGCCA |
| AMPL193030       | ACAGCAGTGTTCCTTCTTTTAGGG    | CTATGACACTCAACCCTGTGCCTCT  |
| AMPL193023       | TCTTGGGTGTCTTATAATCTTGAGT   | GGTAAACAAGGGTGCTCAGGGGTGT  |
| AMPL193024       | ACCCACAGGAGGTGAATCAACTCTG   | ATCAGGTGGTAGAGGAGCTAGGGGG  |
| AMPL193018       | ATTGACAGGCAGAAAGATGAGATGGA  | TTCTGCCTGCCTGTGGCTATAGAAAG |
| AMPL193016       | TGCTAAGCTGGTACGACCAAGAGAA   | TATACCGGATGGATGCAGGTGACTC  |
| AMPL193017       | ATCTTGAGAGTGCTTGAGAGAAGCT   | GAGACTTACTAAGGGCCAGGTGCGG  |
| AMPL742144       | TGAGGGACACACTGTCTCTAAAAAC   | GGACATTTCAAGTCAAGACTTGAAAA |
| AMPL742143       | CCGATGGGTCGAACTTCCGTTTCAGA  | ACTAGGAGAGGGTCTGTGGGGGAA   |
| AMPL742146       | TTGAGGAGCCTCTAGAACTATGAGC   | TAATTGCCTATTGGCCTGTGCTGCC  |
| AMPL328824       | CGTTATGAGCTCCAGACTACATCTC   | AGAGGCTTTGAAGGCTACCTCTGGG  |
| AMPL1140917      | AAGGTGCTCGCTCGCCGAAGGACTA   | CTCTGAAGCCTTGAAGAATGGGGCC  |
| AMPL193682       | GGTCCCCTCCCTATTATGCCCGTTT   | AAGGACTAGCGCTCTGTGCGCGCGG  |
| AMPL193679       | TCCCACACTTACTTTGTAACACTGAT  | ACAAAACCTTAAAAAGTGTCTCTGA  |
| AMPL193675       | GTTTTGAGCCATTCATTTCTGCCTT   | ATTCACAAAGCAGTTTACGGCCAGC  |
| AMPL193676       | CTCATATCTTCTGAATTCTAAACCA   | ATTTGGCAGCCACTGAAAAAGAAAC  |
| AMPL193677       | GTGCTATTCTTGCAACTCTATTTCA   | TCTTCCCTTACACATCCTTCATAAA  |
| AMPL193683       | CACATTAAGTACCCAGATCCGAAAC   | TGATTCAAGGCTGGAATCATCCATTG |
| AMPL193678       | GTGACAGGGAGGACAAAATTAACGG   | TCTACATGCATCACTGTTCTTTCC   |
| AMPL193680       | CGCCCAGCCACTATTACTTTTTCTT   | CAAAAAGAACCCTGCCAAGAATCTT  |
| AMPL193681       | AGAGTACATTCTAAGACTGTCCCTA   | AAAATTTACACCAGTGGAGTGGCT   |
| AMPL742124       | TCATGACCTTCAAAGATGTCTTCGT   | CAAAGTGACTAGGGCAAGTTGGAGG  |
| AMPL742125       | TACAAGACTCAAAGTAAATAGAAAGG  | ACATTTGTAATTTGTGTCCATTTGC  |
| AMPL193063       | TTTCCGGCATGCCCTGAAAAGAGC    | CCTTAGTAGAGCTCCTTTCTGTGTT  |
| AMPL193051       | CGGAATCCGCACAAGCACCAACGTT   | ATGTTCGAAACCTCCTCACCTCCTGG |
| AMPL193054       | TCAAACCATTCTACTATCACAATCT   | TATTAGCTGGACTTCATGCTGCTGA  |
| AMPL193057       | GCCTTTCCTAGGCCTGGAATCTCCT   | GCCAGGAGAAGCCTAAGTAAAAATA  |
| AMPL193061       | TAAATGTCTTTTGTGGAAGTTCAG    | TGCAAGACACTGATATGATGACTG   |
| AMPL193062       | TATCATTGATACACAGTTTAGGTTT   | TCTGTGATCAGAATTCCTCCTCTT   |
| AMPL193045       | GAAAAATACAGCCATTTAAAGCTAG   | GATTTCTATACCACTGGATCCAGTT  |
| AMPL193064       | TGGTATAATCATGTGGGTAAGTCA    | TCCTAAGACCAACTTTCAACCTCTT  |
| AMPL89312        | CGACGAAGTAAATCTTCTGTAAAG    | AAAAAGCTTGAATCTGCTGGGCGCA  |
| AMPL89313        | CTTTATGAGGACAGCACATTTGCCAA  | TCTGCATCTTACAAAAGCTTCCA    |
| AMPL193050       | CAAAGGTGCTACAATTAGATACTAA   | AGCATCATTTGATCCAAAAGGTACA  |
| AMPL193046       | ATCTTCTTTTCCAAGTCATTCATTA   | GAAACAGTTACAGTCTGATGATGT   |
| AMPL193047       | GGGAACCTTATAAAAATAATCTGGCA  | TCACTGAGATTAGGATCAAATGAAG  |
| AMPL193048       | GAAAGTAATATCCAAACTGTGCACT   | TTCTGGGTAAACCATCCAAGGCTG   |
| AMPL193049       | ATCATGTTAGAGCATTAGGGAATT    | TAATCTGTTTGGCAGGGTCCAAGCC  |
| AMPL193053       | ATGGCTTGCGAAAATAACAAAACAC   | ACAACCTCTTAGGGACAAATGTAGT  |
| AMPL193058       | CAACAGCATCTAGCTGAGCTAACAC   | AAACAGAGTACTGGCTGGGTTGGGT  |
| AMPL193059       | AGAACTGGGAATTTCTCCATCAAT    | TCTGCATTGGTTCTACATAGCCTGT  |
| AMPL193055       | AAATATACTTTTCTTCTCACAGGA    | GGATTGTTAGTCTAAACTGTACAC   |
| AMPL193060       | AAGTTTCCCATTACCAAGTTCTGAA   | TCCCATCACATAAAATGTGGTAACA  |
| AMPL193052       | CACTAGAAAACACAGAGGAAAAACAAA | TGTAAATGGAATTTATCCTTCTCAC  |
| AMPL573938       | CTATTACTTCAGCTTTTAGCTGTTT   | TGCACTGTCTAGTTCCCAAATTCCT  |
| AMPL573939       | ACATCACTTATTATTGCCTATGTCA   | TGATGTTTTCTTCTGACATTTCACT  |
| AMPL323324       | CTGAGCTATTTGTTTCTTCCAAAAT   | TCCTCAGTTACAGCTCTCATTTTTTC |
| AMPL1140911      | GCCCCAGTGCCAATCAACAGGCGC    | CGAAAGGCTCGGAAAGGGGCTCGC   |
| AMPL1140912      | GCCCTCCGTTGAGGTTCTTCGCCTT   | AAAGCACCGCATCTACCGCGCGGCT  |
| AMPL91660        | CCCTGCACTCATTCAAGCCAACCTCT  | CTTGTTGGCATCACTCAGCGCCGGA  |
| AMPL573932       | TACCTCTAAGTGTCTACCTCGATCG   | TCTCCTCCGACCCTGTTTACAAGCT  |
| AMPL573933       | TGCAGCCTACCTACCGAAGGACCCA   | CCCAACTCACTATCTCCGCGCCGCG  |
| AMPL91653        | AAAAAAGTCTGCCTGTCTGTCTGTT   | CAAATAAAACAATCCAAGTCTTCTG  |
| AMPL91662        | ATATATAAAACAAGGTATCTTGTTA   | CCTTTGATTTTGAACCTAGAAAAGAA |
| AMPL91673        | GAATCTGATATGACCCTTCGTTTTT   | CTAACATTTAAGTGTCTGAGCACG   |
| AMPL91674        | AGGGCGTTTCTTCTAGAGCTTTT     | CTACTTCGCCTAGATCCTTGTGTCT  |
| AMPL91664        | TGACAAGATCAAAGTTCTGAGACTT   | AGCCATTTCCAGTCAACATTCTCTT  |
| AMPL91665        | ATCACCTCCAGCACACTGTAAGTC    | ACTTCTCATCCCAGGAGTACAAGA   |
| AMPL91666        | CAAAGTTTTGGATGCATCCAAAAC    | GGTAATGATCCTACAGATCTCCCTC  |

AMPL90995 AGCTCCTGATCAATAAGGCATTTTT TATCAGACCTTCTGAAGAGAACAG  
AMPL91667 GGCACAACCATGAGGTCTTCTATGG ACACAACCACCTAGAGCAGAGAGGG  
AMPL91668 AATCAGGAAAACGACCTTCAGGATT TCATTAATAGCATAATGGTTACAGA  
AMPL91669 CAGCTGGTAACGGTTCCTACCAATC GAGAGATGACCTGCTTAAGGATTTT  
AMPL91670 GCAAACAGCACTACTTATCAAAGCC TATGGTCTACAGCCAATTCTGTTG  
AMPL91671 AGAATTACTGGGCGACACATAGGAC CTAAGATAGAGCAGAGGCCAGGC  
AMPL91672 TTGGAAAATGATCACCTAAGTATGT CGACTATAGTTAGCCAGGCACAGTA  
AMPL91661 AGTGATGTTTTAAAGTAACACCAG GCACTCTAAAACAACCTTTCACAATC  
AMPL91655 TCATCCACAAGCACCAGAGAATGTG GTTAAGAGACCAGCCTAACATGGTG  
AMPL91656 TGCTCTAAAAACATTCATATTGTTT ATGAGTATGCTGGCAGTTTCACCTA  
AMPL91657 TTTCTACCATGCATGCCTTAAGAAA AGCAACATCGGTTAGTACATCCACG  
AMPL91654 TTACTGTTTCTTTGAAACTTAAGGT ACATACCATATGTCCTAGGCCACCA  
AMPL91658 TGCATGTACCATAACATCTAGACTT TTCATAGTGCATCATCCCTTCCCT  
AMPL1420985 AATAAGACGATTACAGGTGAGAGT AGTCAACTAATAGTCTTATGCCTGG  
AMPL1420986 AAAATAGAAACCAGATGGGAAGTAT TTTCCATGGGTCAGTGTGGAAGTATG  
AMPL1420987 TTCTCATGGCTATTTTCTAGTTCTA GATTGAAATAAGGGTAAATGAGCAA  
AMPL1420988 AAAATTGGCTTATTCTGTGCTGTTG AACTGTTTCCCTTTTTCCTTGACAG  
AMPL1420989 AGCAGTTTCATCTTTGCTTTTGTTA ACATGACTGGTGAGGAAGTCTATT  
AMPL1420990 CACATTTCAATTCTGATAGAAAATGA GCAGTTAGTTTGTGTTAAGCTCTTG  
AMPL1420991 AGACACTGAGAGACTTGCCAGTTTG CCAAAACAAAATCCGAGGCGTTAGA  
AMPL1420992 GAAGTTGGTGATTACTTGATTTACA ACAAAGAGGACAGTTTGATAACTA  
AMPL324361 CCAGCTAGCAAATTGCATGCTCCAA CCAGATCATAACAAAAGCCATACAG  
AMPL1420993 TTTCTACACTTTCATCCCTGTTTTT AATTAAGAAGCAGTCTTCTTGGT  
AMPL1420994 ATCTTGGTTAAATAGACAAGTGGTA TTTTGTGTGTGTTGTAATAATCAA  
AMPL1420995 TAATGCCAGATTAGGAATTCATGTT TGAGTCTTTTAATATTCTCCATACC  
AMPL1420996 CTGCACACAGTATATCATCTATGAA TTAGAAGCTGGGATTGCTTTTAAAG  
AMPL193584 TTCAGGTAAGGGATATTCAACTTGT TTATCACCCAGAGAGGGTTCGGCAG  
AMPL193588 AAAGTCCATGAAGAAGAAAACCA CTGAAAGATGATCACGATGAGCAGT  
AMPL193585 TAAGTGTAAAAATTGTTGCCCTTTGA ATTTTGGAAAAGCTTCTGGCTGGGC  
AMPL193575 TGGGTGTAGATTCAATGGAAATAAT AGATGATCCTTTTGGAGAACTACCT  
AMPL193580 TTGATTCTAGATTCTTCTGCCTAAT GCTTACATTACCAAAACAATTATTG  
AMPL193589 ACAATAAAATTAAGTGCCTGACGTTT TCAAGGTGTGTGATAAAGCAGACTT  
AMPL193574 CAGTAGCCTTAAGAGAAAACGATTT TCTGCCACATATACTTTTTAGTC  
AMPL193576 CCAGGTACACCACCTTCTACATTA CTACTTCAGTTGGAGCAGTGGCCCC  
AMPL193577 GTCTCCAGACACTAAGAGCAGGAAT TACAGGCGAGTGATGCTAGTCCCT  
AMPL193578 CCAAGTCTCCTGCAGATGTTTCTG TCCTGAGAAGGTCTGCAAAAATTAT  
AMPL193579 GGGAGCAATAAAATTCATGTAACAG AAGGCTTCTGCAAGATCTGGAAAAA  
AMPL193586 TATGTTAGAATAACCTCTGCTCCAT TCTGGAGTTCTGGAATACGTATTC  
AMPL193587 CCTTCTGCTTTGAGAAAGTGAGAAA CAAATAAGAAAACCAAAGCTCAAAG  
AMPL193581 AAGGCGGGACGATGCCGATAATCG TCACCTTATTTTTGGGCGACTTACC  
AMPL193582 GCGAGTCCCTATTTTGGGAGCATTG GGTAAAGACGGAGCTCTTGGGGGT  
AMPL573936 GCGGCAGCTATTGATTGGCAGCTT AATGTGGATGACGCCCAAAGAAAGC  
AMPL573937 GCCCGTTAAGTCGTAGCCCTAAGT AAATTTCTCAACTCTGTGGGTGCT  
AMPL573930 ATCTTTAACTTCGCATGTTCTGCA CTTTGATAGCATTAGCTGGCCGCTG  
AMPL92077 AACAGTGCCCAGCAAATAATAGGTA ACAAACAATAGTGCCTCATTAACGT  
AMPL573931 TTTCCACACAGAAAGACAAAGGATT TGAAGCCTTCTGAACTACTCAATT  
AMPL92079 TCAGATTGCATACATTAACAAGT TCCCATTTCTTGATTTAATCCAGG  
AMPL92060 AAAGATAAAGTGGTGTGAGACAG TGCTTTGATGACATGTTGAAAAAGA  
AMPL92065 CTTAGAGGATATCTTGGGACCTCCA TCATTTTCTGTTTATTTCTCCACT  
AMPL92059 TGGCTAAACCTTGACCAGAACTAT ACAGTTCTAAGCACTGACTGGGGCC  
AMPL92074 AGGATTTATTGTCTCATGGCTGAGA GAAAAATAAACAGCAGAAACTTCA  
AMPL92073 ACTAAAGCAAACCTTAAACACACAT ATCTCCACCAGCAAACCTTAAAAA  
AMPL92058 CATGAGGTTTCTCCATGTTAATCA AACTAACTTTGTGAAATGAGGGCC  
AMPL92069 TCCTTTTGCCAGTGGTGTATGGGAT GGAAGAAAGGTGCACCTTACCTGT  
AMPL92072 TAATACTTGCAAAGAAAGTTCTTAA AGAAGATTTGAGGCCAGATGACACA  
AMPL92061 CGGGAATCTGTACGAACCATCTGGT TTCTGCCCCGAAATTTGAAGTATAAA  
AMPL92062 AGTTTTATTACAGAATAAAGGAGGT TTATCACTACTTCCAGAAGTAGAAG  
AMPL92076 GAGCTTGCCAGCAAAACTGTAGTG AACTTCTCTGTGCTGGTTCTACAGA  
AMPL92067 GATTTGAAAACCATGTGTCTGACT GCAAAGAAGCCTGAATTGAGCCTCC  
AMPL92078 CCATATGCAAATCATAACAATACAGC CTGGTTAACAGTCTAACAAAATCTC  
AMPL92075 CTGGAAATTTTATTGAAAGATAACA AAGGAAGTGCCTGAACAATCCCAA  
AMPL92068 CAGGCCCTCAGCTATCCCACCTTA TGACCACGTTACTTGATTGGGCTGG  
AMPL92063 ACCTTGTGGGTACAAAGAAATCCC AAATGGGACTGCTGAATATTGCTGG  
AMPL573927 ATATTTCCATCTTCTGTGAAATGTT ATCTTGTGGGCTAGCCTCTCAGGGG  
AMPL573928 TTTGGCATCTGAACTGACACAATAT ATGTGTGAGCGCAAGGCTTTATAGA  
AMPL1420968 GCCCTGCGGATCACGTGGGCCTCTA CTCATTCTCTCTAACGTTCTGTGT  
AMPL1420969 AGGCTTAACTGAGGCCGAAGCAAG CGGGAAATCAGAGTCCCGCGGTGGC

AMPL1420970 TCCGAAAGATGTAGCGACCTGTAAA AATCTCAGGGTCAGGAGGATCCGGG  
AMPL253605 GACTTTCATTTCTCTTTATAGTTTT GTGTTAATGCTGTAAGTTCACAGAA  
AMPL253607 AAAACAACCATCAACTTACAGACCT AGGGAACAAAAAGAAAAACATCCAA  
AMPL253592 AAGCATCCAAATTGCAAACACAGTT AAAAAAGCCCTTCACCTATCCCGTT  
AMPL253591 AACTGGGCTTCTTACTTGTAAATCT AGAAAAGACAAGTGAAAGAAAATATG  
AMPL116071 TCCACGATGTATACTTATATCAAAA TCACAAGCTTTTTCTTATATTGCT  
AMPL253590 TTTTCCAATGTGGATGGCAAATGG TAGAGCAGGCCTAGAGAACTGAAG  
AMPL253611 CTCTGGTGATTGTGATATAAGTCAT TTCGGCTATCCAAGGCTTTAATTTTC  
AMPL116146 TAAGTCCTTGGAGATTCTTCATTCA TCAGTCCCTTGAAAAACCTGTGTAA  
AMPL253610 TGGAGTCCAACCAAAAATTAACAATA GATAGCTGCAGATTACAGAGTTATA  
AMPL253603 CCAGTTTTCTTATCTCTTATCTCAT ATTACTGTACTGAATACTTTGGCAA  
AMPL253604 GAGTCAGAAGATCAAGATTTTCAGA TGTTTCAGAGTCTCTTTTTCTGCAA  
AMPL253598 ATTTTAAAGTTTTCTACATTGCTGT ACAGATTAGTGAGTCTCAGTCAAC  
AMPL253599 GGCTATTTAAAGTACCAGACAGTAT TTGCTTAACTCACGTTTCTAGTCAA  
AMPL116152 GGTTAATTCATCACTGTGCCTAGAT AGAGTGGAGTACCAAGTCGAACAAT  
AMPL253613 TGAAGTCTCCTTGTATGTAAGAACT GATTTGTTTCATCTTTGTGACGCTAT  
AMPL253595 TCCATAACCAGGTTTTTAAATTCCT AAAACAAGACAAATTTCTGCCAACA  
AMPL253608 CAAATCACTGATGACTTCTTGTAAAC CTTCCAAAGAGCATGATACATTAG  
AMPL253609 CTTTTACAATGTGCTGCTACATGTA CTGAAAAACTCTGACAAAACGGGG  
AMPL253601 ACTCTCACACTTCAAATTCAGCCA AAGTGACATTGTGTTCTTTTCAGGG  
AMPL253585 CATGTGCTCGCAATGTCAAAGTCTC GCAATTCAAATGATGTAACAAAAG  
AMPL253586 GAACCTCAGTGGATAATTCACAGT CTTGATGTTCCCTGTGGCCACTAA  
AMPL253587 AACCAGCTTGTCCAATGGCGAAAAC TTGCTGACGACGTTGCAAATTAGTG  
AMPL253589 TGTCCGACGTGGTGTATGAACATA AGGACAGTACCATCATTTTCAGTCC  
AMPL253584 TTTCTTTGTGTTTCTCGCATTCACT CTGAATTTTATGATCGCAGACAAGT  
AMPL253588 TTCTTTTGTGATTTCTATTCAATG TTCTTATAGTCGCTTTTCCCATCTT  
AMPL253600 CAAAGGATACCAGGCTGAGGCTAAA TCAACAGAGGGAGAATAAGCCAGTG  
AMPL253597 CCAGTCTAATACTTACTGGTCAAGA GGTTAAGTATCATTCTCCTTAGCAA  
AMPL253612 CCAGGGAGGTAATGCTGGCATGATG CAAAACTTTGCTGCTTGGCTAATAC  
AMPL253606 AGAGCTTCCCACCATTAGGTTGATG ACAGATGAGGCTGACATTACCAGAG  
AMPL253602 GTGGGGAACACAGCTAGAGAACGTT AACGTCACAGGTTCACTGTTAGGTA  
AMPL1420959 GACCTACATTTCTATGGCATTAAAA ATGAACCTGTGCTGTGTGGCCGCA  
AMPL1420960 AGGCAGTAATTATCTCCTTCTCAAC TTTAATGAACATTGAATCCCAGGGA  
AMPL1420961 GAGAGCTCTGAGTCTGGATGACCAT AAGAAGCATGCATTTGCACTGGGGA  
AMPL1420962 TCAGCTGGCAATTCAGGAAAAACT ATGTAGGAGAAGAAGGTGGTGGGTA  
AMPL1420963 CCTTTGCTGTATAAAGTAACAGTCA GCTTTTCTTAGAAGTGGCATCTGAA  
AMPL1420964 CTAAAGCTAGGAGATGTTGAATTTT AATCAGGACCTGTCTATCTTTGGGG  
AMPL1420965 TTGTTATTCTTTGCTGCAACAATA TCATTTTCTGAAATCTTGCATTCTT  
AMPL1420966 TGTGATGGCTATTCAATCCAATGTG AACATGTTGATAGAAGGTAAGTGGC  
AMPL1420967 ACAAATAAGAGGGAGTGACCAAGCT TATTTGGAGACTGATCTAGAAGCAG  
AMPL573941 CATCACACCCATTTAAAAGTGATCT TAAAAATAAGAACACTTGGGCTGGG  
AMPL573942 AGAGCTGCCATTCTGACGTCAAAA TCAAACCAGATGGAGCATGCTTGC  
AMPL92312 GCCCGGCCTCAGATGTTATCCTAA TAAACGCCTTTGTGATTGCCAGGGG  
AMPL91384 CTAAATGTTTACTTCAGGATATGG GAACTATAGCGGCTGGGTGTGGTGG  
AMPL92327 CTTTATTTGTTTTTTGTATTGTTTG GATCTAATAGAGGCCAAGGCAGGAG  
AMPL92317 CCAGGAAGATACCGGATGTAAATTT CCGAAGATGAACTAAGAAAAGAGAT  
AMPL92318 AAGGGGTATGCTGTCTTCTAGCACT TCAGCCAATAATCTCGCAACCCCA  
AMPL92319 TGTTCACTGTGTAATTAGCATGTG TCAGGTGCCATCTCTGACAAAGGCG  
AMPL92314 GAGACGCTGTCTGAAAATAATAATT GCTTCTAAAGCTTTTAGCTAATGTG  
AMPL92313 CATGCTGGTTGGTTAGAATAGAATG GCTCTGCTATGACTGGAATGAGATA  
AMPL92315 CTTTAAAGAAATGTGCCATGTGATCGT AGCTTCAGATGTTTCAACTGAAGAC  
AMPL92316 GTAATGTCAATAGCTTACTAAGAA GTGATTCTAAGGCTAATAGTTTCGT  
AMPL92321 CTTGCGTTGGATGTTGAACTTGAG TTGTCCCTTCCAGTAGAATGGAGAA  
AMPL92325 TGATCACAATGGGAAAATTATCCAG GTGTTTATTAGGACTGGGCAACACA  
AMPL92326 CTCCTCAACCATTTAGATCTTGATT CAGCAGTTATTTTCCACACTACCTG  
AMPL90475 GTTATAGCACTTGAGATATCTTAGT GTTTTCTATCTCAACATCTCAACTT  
AMPL92329 TTAAGTAAGTTGACTTTTTCTAATC TACAATATTTTATCCACTCACTTG  
AMPL92322 AGTCTAAGCACTGCGGTAAAGGAGT ATATTTAATTTGCAGAACAGCTGGG  
AMPL92323 ATGTTTTCTCCATGTGGATCTTAGT AAGCACTGCGGTAAAGGAGTTAGTA  
AMPL573943 TCTTTGACGTCACGAAGTCGACCTT TCAGTGTGTCAGCGATCTCGTGCC  
AMPL496117 TATCCAGTCATTGTAACACTGTTTA TGACACAGTAGCCTATAGTTGGGCA  
AMPL496118 AGATGCAAGTCTCTTGTCCGATATA ATCCTTTCTCATTAAATACCTTG  
AMPL496119 ACATATGGTCTCCATTTTACAGTTA ATTACACCTAGTCTGTGGCTTGACT  
AMPL496120 AAAGCTTCTCAGCCTTCTAGGGAA GGACAGATTAATATTGTTCTCTGTC  
AMPL496121 AGTGAGGAATGGAGGCCATATTTCC TGAGCCAATCTGCAATTTCTACTAC  
AMPL496122 TTAGTTTTACCAGAATGAAAAGAC TGTAACAGAAGCAACAGAAGGGAC  
AMPL496123 ATTTTGTAGTCCTATCAAAATTCCT TTTGGTGGTCTTACTGAGCTGGGTG

AMPL496124  
AMPL496125  
AMPL193509  
AMPL193508  
AMPL193516  
AMPL193512  
AMPL193518  
AMPL193519  
AMPL193514  
AMPL193515  
AMPL193525  
AMPL193510  
AMPL90577  
AMPL193520  
AMPL193521  
AMPL193511  
AMPL193522  
AMPL193524  
AMPL1338740  
AMPL193507  
AMPL1338741  
AMPL273654  
AMPL273655  
AMPL273656  
AMPL193088  
AMPL193090  
AMPL193091  
AMPL193086  
AMPL96430  
AMPL90806  
AMPL193079  
AMPL193080  
AMPL277289  
AMPL193081  
AMPL193085  
AMPL193084  
AMPL90810  
AMPL193082  
AMPL273627  
AMPL273628  
AMPL92667  
AMPL273629  
AMPL273630  
AMPL273631  
AMPL92673  
AMPL273632  
AMPL273633  
AMPL273634  
AMPL273635  
AMPL273636  
AMPL273637  
AMPL273638  
AMPL273639  
AMPL273640  
AMPL273641  
AMPL273642  
AMPL273643  
AMPL273644  
AMPL273645  
AMPL273646  
AMPL273647  
AMPL273648  
AMPL273649  
AMPL277286  
AMPL277287  
AMPL277288  
AMPL1420972

TAAAGTTACAATGTTTTATGGCCTA  
CTACAGTTTGAAAGTTCTTTACCTT  
GTGGTGACCTCCAGGATGTGAAAAT  
GGCACTTATGCATGATTTACCATCT  
TTCCCAAATGACAAGTGACTTTTCT  
CAAATGCCTGGTCATACATAACATG  
AATGGATGATGTGGCCATAGAAGAT  
AGCTGTGTTCATTTCTGTTTTTGT  
CCTGCAAAAACAAGCTCTAATAATAA  
TGCTTTCTTGGGATGGTAAAAATATA  
ATGTGCAGTATTCCTAGTTAATCC  
AAATTGGATTGGCGGTGATTTTCAT  
GCATTTGAAATTCTGTCTATACCAT  
CTTCTATGTTTTCCCAAATCAAATTC  
CAGATAGTCACTCCGTTTACAATTT  
ATGGATGTAACAGCCTCTTTGTAG  
ACTAAAAATGGCCATCTCTGCAACT  
TGGGAGGTTAGCCACCTGCCTATTG  
CCTTGGGTGATAAAAAGTGCTAAAAA  
CACTTACATGTATGTGTGTTCGT  
CACATTTCAATACAGATTGTGTCTGT  
CGGCTCAACTCTCAAACCTCCATCA  
GCCGAGGAAGAGGCTGCACGGTTAG  
GCGGCGCACGGGAGGTTTAAAACCG  
GGGAGAAGACGAATAATCCTCCGAA  
TCTAAGAGAGTGACAGAAAAGTAAA  
TCCATTAGGTACGGTAAGCCAAAAA  
TTGAATCCAAAAACCTTAAAAACAAA  
TCTAACAAAGCAGATAACTTTCACTT  
ATCTCACTCGATAATCTGGATGACT  
ATCATTACACCAGTTCGCTTTTC  
AATTCTCAGATCCAGGAAGAGGAAA  
ATATTACACAGCTACACAAAAACAT  
CTGCATAAAATTTCAAATGTGGTAAA  
CACCTGCAGATCTAATAGAAAACAA  
TATTCCTTGTCTATTCTGCACGCT  
ATTAACACACATCACATACATACA  
GAAGTACAGCTTACCTAGAGAAAAG  
ACTGGTAATCTGACACAATGTCTTA  
ATCAGTCTGTCTCCACTTTTTATAA  
TACATGCATTAGAATGTAGCAAAAAC  
TTTTCTAGCACCAATATGCTTTAAA  
GTTGTGACTGATGTAGGTACTAAC  
TGTGCAAAAAGTCAAAAATTCATTGT  
TGTAGGACAATTTCTACTGAAAAAT  
AAGGTATAATTTGAAGACACCAAAT  
TAGTAGGTCTTATCAATCTGTATT  
GCTTTTATGAAAGACAAGGTGGCAT  
TCATTCAGACCTTACATTCCAAAG  
ACATCCAAAAAGTCTAAGAAAATAT  
ACAGCCATCGTTATGAACATATTGC  
CAGTGCATAGCATTTACACACAGAG  
CATTAAATAAAACTTCAATGGACTT  
TACTCTACTCTCAGGCCATGTTTTT  
GGCACAAGTCATGATGAGTAAATGA  
AGATACCGAAAAATAAATGTGTGT  
TATTACAACGTACAAAAGGACATGAT  
GGTACTGTCTTACAACAGTTTGGA  
CAACCAGAGTACTACCACCAAAGCA  
TGAATTCGAAAGGATTCTCAATAAC  
CTGATAAGCCAACAGCAGCCTTTTT  
TGCATGTTTTTATAAGCCCACTATA  
CTTCATTCCACACAAAATAAATCTC  
CAGAAAACCACTGAAACATTTGA  
GTCATCCAGGATTAACATTTTCATT  
TATATACAGCAGGGACTTGGTATTT  
CACAAGGTGGTCTTCTGCCATTAG

ACACAAATGATAGCATAACATATGC  
ATGTAACAATTGTTTGTCTGTTTT  
TTGGCTATAGCATCGAGGTTTGGGG  
TCCTGAGTTACAGAGCATTAACTA  
CAGTGATGCTAAACAAAAGATAAAG  
TGCCTTGAAATGGATTGATCATGGT  
AGCATCCATTAATGTCTTTAACACT  
ACAGTTATTCAAGGACACAAAACCA  
TAGAGCCACTAGACAGTTTCTCCTT  
CAAATACTTTGGCTAAGATGAGAAT  
AGAAAAGCATGGAAGAATGGGATACC  
AGTTCAGATCAAGCCAAGTATAAAG  
ATTACTGTGATCCTCAGGGCCATCC  
TTTGTGCTTTTACCTAACAAATGT  
TGATCATGGCTGTGATTACGGGGTT  
GGATGTAATAGTTGCTGTGTTATAG  
TACCCACTCCATCCCTTTGTATACC  
ACAGTATAATTTAGTTCTGCTTAG  
ACAGACTGCACCAAAGCAAAAAT  
ACAGGATTTGTCAATTTATAGAGCT  
CTATTTTCCCGGTAGCAGTGCCTC  
CTACTGAGCATGCCAGTGTAGCTG  
TCCGAGAGGAGAGAAGTACGCGCAG  
ACGAAGAGGAGGCGAGAAACGCCCG  
CTTTCAGGAGAAGCCGAGGAAGAGG  
TCTTCTGCAGGATGGAATGGCTCT  
CACTATAGCTGGAGTAATAAAGGT  
AGCATTTAGTGCAGTATACCTAGC  
AAAAAGCCACCATTAACAAAAATGAG  
AACATTGCCTGAATCTTTATAATGT  
AGGTATTTAAAAGAAACACTGGATT  
TGCAACTGTGGTAAAAAGATAACCT  
GCACATGCTAAAATAATAGTACTGT  
AACTGGGTCTAGCCATTTAAGAAC  
CCTTTAACTGTCAAACGTCAAAAA  
CATTACATGATTTTTCTTCACTCA  
ATGCTATCGATTCTTGATCACATA  
AAGATGTTCAACATTTTCTTCTTG  
TGAAAACCCACAAATATGACTCATC  
ATTCAAGTTTATTTTCATGGTGT  
AACGGGAAAGTGCCTCTTTATTA  
CTCTCTTAGCCAATGCAAACTAT  
AAACAACAAGCAGTGACACGGCCA  
ATTTTAGCACTGGCCTTGATTACAC  
TAAGGTCAAAAGGGTGAACGGCTG  
TTTTTGTGTGCAGCATTGAAAGTTT  
ATTAGCTTTACAATAGTAGTTGTAC  
TAGGTGAGACCACAGCTAGTGAACA  
ATGGTGAGGTGTTAGAATAGTTGTC  
ACAGTGCAAAAGCCATTATAATGT  
AGAGATTACCTACAGAATGCATTT  
TTTTTAAAGCTGAAACATTTGATGC  
TTGAACTTTTGAAGTGGCAGGTAGA  
ACTCTCATTTAATAAAAACCCACA  
TTTTTAAACAGTAGGCTTTGAAGGA  
ATGCTGATGGCAGAGTACAGAATAA  
TGAAAGGATATGCTTTAGTCTTCAA  
AGCACATTTCTATTTTCAAACATC  
TGTTTCCATTACAAAACATTTCTTT  
TTGTCCTTTCTGTCTTCAACATTAC  
TGCATCTGTGGCATTAGAAAGTAAT  
TAATTTGCTCTAAATTAGCAACTG  
CGGTAATTTTCAAGGCTAAAGGTGA  
AGCACAGATGAGAATCCTCATGCAA  
GCAGTAAACAGACTTGGCAAACTGA  
TGAAATTTCAATGAAAAATGTTTGC  
TATCTCAATGGGTGGGTGCAGTGG

AMPL1420973 TTCCTCGAAGTTCCTAGGAAATCTTT  
AMPL324332 TTGGTATAGGAATGTAGAAGTCTTT  
AMPL1420974 AAAAATTGCTCTTGGCTGTGAAAAGA  
AMPL1420975 ACATCTTTATTGAACTTGAAATCTA  
AMPL1420976 GGCCCGACATTTCTTCATAGGTAGA  
AMPL1420977 TGCCAGGATTTCTCATTAAACAATAT  
AMPL1420978 TCCCATTAAGTGGTAGTAATTTCTCT  
AMPL1420979 CTAGAGGTTCTGGGTTTTCTGAAAAG  
AMPL1420980 ATACAATAGCATTGATTCACCTTGT  
AMPL1420981 TCAGTGAAGCAGGGAACAATCACTA  
AMPL253545 GCTAATGTAGATTTTAAGGGAATTG  
AMPL253540 AGTGTTAGTTTAAATGGTTATGGCT  
AMPL253546 TGAGTTATGCGTACCTATAAATTCTA  
AMPL253552 GGTCAGACTCTAGATGTTTGTCTT  
AMPL253543 GGATGGTACGTTATCTCATTGTGTG  
AMPL253551 TTGCTTCGGGTCAATATGAGTTTTT  
AMPL253539 AGGCTTAACTACAGCTGTCTACTAT  
AMPL253557 AAAGTTTGGCCTTACCTTCTCCACT  
AMPL253556 GCATAAACACTGTGAATACTGAAGG  
AMPL253550 AAAGGTGCATAAATGACCTAGGAA  
AMPL253548 GTTTGCACATCACCCTGAGGAAATT  
AMPL253547 AAGTACTAACTTCATTCCAGAACAA  
AMPL115721 CTGGTACATAGAAGGATGCAATAAAA  
AMPL253553 CCAACAGTAAAGTGAATACTTTGA  
AMPL253554 GTGATACGATATTCATGCAGATACC  
AMPL253549 GCTCTAAACTAGTGGTCATATGCCA  
AMPL253544 TTCTGTTGATCAGGTGGATTTTATT  
AMPL115703 TTAATTACCAGATTGAAAGTCCCTT  
AMPL253541 AGATGCAGTCAGAGGAAATGATACG  
AMPL253542 TTGAACTAGTGGTTAGGAAAACCTGT  
AMPL1420984 ATGAGACTTCTAAATTTGCCAGCT  
AMPL1420982 ACCGTGTTGTTTTCTTTCCAGGAT  
AMPL1420983 ACCCACCTGACAGAAGGGAAAATCG  
AMPL201372 GGCCACGGCTTCTTTTCTCCGTTAG  
AMPL201373 GGAGGTTATTGGCCAAGTCCGCTAA  
AMPL193505 TCAGGATCTCGAATCAGGCGCTTAA  
AMPL193467 ATTCATATGCAAGGCATAATGATAT  
AMPL193469 CAAACTTATGCAACAGTTAAGTCTCT  
AMPL193449 TGCTTTCTTTGGTGAAGTTTCATTT  
AMPL193485 ACTGAGTCTAAAACATGGTCTTGCA  
AMPL193453 ACCTGAAGAGCTCTTTTCTGTCTG  
AMPL193454 AGTCATATCCTCCTAAAGAACACTA  
AMPL193506 ATAGGCTTTTTGTGAGAACAAGGT  
AMPL193468 CTTAGTTCTGGTTGAGATGAAAAGGA  
AMPL193161 CTCTGTCTTGACACAATGCAACTT  
AMPL193163 TGATCAGGGATATGTGAGTGTGTGT  
AMPL193475 GTGGAGAGAGCCTGATAAAAACAAAC  
AMPL193481 TTAAGATGCAGCTACTACCCAGCTA  
AMPL193492 GCTTTTACTGTAAACTACTGGATT  
AMPL193479 CCACTCAGAAAATCTAGCTTTAACT  
AMPL193486 GTATGGGTATGGTATGTGTGTGCT  
AMPL193461 TAGCAATGGACTTCACCTCATCAAA  
AMPL193462 GCTAGATAATGATTACCACAAGCTA  
AMPL193460 GAAGGTGTCAACCAATAAATTCTT  
AMPL193480 TAATGCTGACAAGTAAAATACCATT  
AMPL193472 CAGGAAGAACAGGATAGAAAGACTG  
AMPL193497 ACAAAGGGAGAAGCTACGTAATGAC  
AMPL193498 TGCTCTGTAATTGATTACAAAAGTT  
AMPL193503 TGCTGAGTAATACGCAAATCCTTAA  
AMPL1149 GCCTACGTATATATTTTTAATCACA  
AMPL193452 AACTAAATGATGAGAGTCTGAACTA  
AMPL193482 TACTACAGGCAACAGAAAACATACA  
AMPL193476 GTGAAGTATCATTCTCCATGAATGT  
AMPL193504 TCATGACCCACAGCAAACAGAAGCTG  
AMPL193499 GTATCACAGCACTCTTTAGATAAAC  
AMPL193450 GACAAAAGTCAGTTTTACCTAGAA  
AMPL193451 CTTTCTCTAGAAGTGGTTTACAGT  
AGGATGCAACTGCAAACTAAAATT  
TGGTGCTTAGAAAAATCAAGCATT  
AAAGCAGCTGCATTTGCTCTTGGAG  
CGATTCAAGTTCACCGCTAAGGAAAG  
ATTTGAACAAAGCAGAAGGTTAAGT  
TGACTCAGTGATACTCATGACCATT  
TTTGGTTCTGTGATACATTCTGA  
TATCCTTAATGGTGTCTCTCTCTC  
ATGCGAACCTATGTCTAAAATTCACT  
GGTTGTTGTAGTAAGAGCTTTGTTT  
GTTTGTACATGGGAATTCGCTGAT  
AGGAATGAAAACAGACCAAGGGCTA  
GGAACATTAAGCTGGAAGGAGCTT  
AGTTATAAGGGCAATTAGGATCACA  
TTGGCAGTTGAGTGGAAAATACAGA  
AGAATAGTCAGTCCATAGGTCTAGG  
TCTGTCTTAAGAGTAGCTCTGAGA  
ATTACATTCATTTGCAGTTGCTGCA  
TGACAGTGGGAATAATTCTCTGTG  
ATCACCATCGGAGGCAAAAAACAAAG  
CTGTAAGGACACTGTTCTTCAGTGA  
TACCCTAAGTGGCAGTATTGTCAT  
GTTTTATATCTCACAACCTGGAAGC  
AGATCAGACAAAACATAGATTTGCT  
TGATGGATGGTTTTGGTAAAAATTT  
CAAGTTGACTTTTTCACATTCATACA  
TAGTGGAAGTACCAGCTACTCGG  
TGATCTTTTTCATGAAAATAAGCCC  
ACTGTCAAAGCTTCTGCTTTTCAGAT  
CGATGAAAATTTAAGACTTGCCAG  
GCAGTAAATAAGGAACCTGTTTATG  
TTTTCAGTCACTGCTGTTGCTTA  
CGAAAAGAAAGACAGCCTTGGGTGCG  
GAAGTGACGACAGTCCGAAGGCGA  
ACTTCTGGAGGAAGAAGCAACGCCA  
TAGAGGCACATTTGGTCAAAGGCA  
TCATGTTCTAGTTGACGGCAGCAGA  
GCAACTTTTAAACCCTTGCTTAG  
ACAAAAATAAGACACTTGGAATGGC  
TCCCATACAGAAAAGGATTTTAAA  
TGAGTACTGCCATACTAATGTACAA  
ACAAGTCAACTGGGTATAAGCAGGG  
AAGCTGCATCAGCGTTAGAAGACAC  
TGGAACAGCACGATCTCGTATCACC  
TCCTAAATTGGCAGGAAAATTGTCA  
CGTAACACATATGGTGTACGTTCCC  
TATCTATCAGGACAGTGCCTGGCAC  
GGACAATTTAAGGAGGACAACCATT  
CCAGAACAAAAATAAATCACTCTGT  
TTTTGACAAGCTATACACATTTAG  
AGAGTAGGACCTAGAAAACAATTC  
TCAGTAGCACCTTAGCAAAAAGAA  
TCACCAGATGTGGAATCAAAAACCTT  
ACTCTACCTTTTTCTTCTATGCAGC  
TTTGTTCATAGACCAGTGAAGTCC  
AATTAGATACTCGGCTACAATAAAT  
AAAATCCAAGTAAAAACAGCAGGA  
ACAAGAAGGCCTAATATAGGGAGAA  
ACTACAAGATGGGTACTGAGGTTAA  
TCAGGAAAAGGATCTAAAAGCTTAA  
GCCATTTATAGACTGACTCATGT  
AAAGGTTTTAAGTCACTGAGTAGCTC  
ATTAACCTTAAGGCCGAGTGCAGTG  
CTTGATGAATGTTAACCTCCACTGA  
TCATTGTACCTTTCTACACAAAAT  
AGTCTAGGCCATTACCATAATGAAA  
ATCCACCAATAGTTGAGTAAAAA

|            |                            |                             |
|------------|----------------------------|-----------------------------|
| AMPL193457 | TGAATATGGATTACTGCAAGGAGAT  | TTCTGGTGGGCAGTACCTAACACAA   |
| AMPL193491 | GGAACAGGAGGCAAAAATAAATCTTT | ACAGAAAATTACAAATTCCTAAAAA   |
| AMPL193484 | GCTTAGTCCAGTAAGTAAATTCAGT  | AAGGTGGCAAACAAAACAGAATAAA   |
| AMPL193113 | GTGAAAATAGCTTTGGGTTTACAC   | ACAGTTCAAAACAACACGAGTTTGAA  |
| AMPL193288 | TTATCTGGCTGTGTAAATATCCACC  | AGCCATACAAACTATCTGGCTCCCC   |
| AMPL193474 | AGTTGTGTTTAGAATGAGGAGAGA   | TAAAATCCCAAAATATCAGCTGGGT   |
| AMPL193343 | TTATCTTTCATCAATGCAAATCCT   | ACATGTATAAATAGCTTCACCAAAG   |
| AMPL193458 | CACTATTGGTAACAGAAAAGCTGCA  | ACCCTTGAACAACACAAATTTAAAT   |
| AMPL193444 | GTTGTCTATGTGTGACTGATCTGAA  | AGAATGCCTCCATCTTTAGTCTGTC   |
| AMPL193445 | TTTTTCCCTCAGGCTTTCTGTTTTT  | AGAGTTCATGTAAGCAAGAGAAATG   |
| AMPL193489 | TTTTGCCAGAATACTTGTGCTTCTT  | AAGGACCTCTCTGTCTGCATGACAT   |
| AMPL193490 | TGATGGACTGATAGAATTGTGATAT  | TCAGAGACTCCACAGTCAACTGAAT   |
| AMPL193448 | AGACTATACAGAGCTACAACAGTAA  | AAAATGTTTTTCTTGGTGGGTGGG    |
| AMPL193493 | GCTCATCACTACTTTCTCCATCATA  | ACTATTGCAAACCTGTCCAACCCAC   |
| AMPL193494 | ACTCAGTTAACTGGTGAACATAAAA  | CTTCTACTGCCTTCAAGAAAACACA   |
| AMPL193483 | GCTTATGTCTAAGTTTTTCAAGCAC  | AGCCATGAACTTTAACAGAACTACA   |
| AMPL193495 | ATTGGTACATAAGAGGCCAAAATTT  | TCTGAGTGTGACTGTGATCTTGATT   |
| AMPL193496 | TGAGGAATTAGAGAGAGAAAATGAG  | TCTTCATTCCGTCTCTTACCATTA    |
| AMPL193488 | TTTTAGATGGCATCTTAATAACACA  | ACTGTCTAGATACTGCAGTGGGTAG   |
| AMPL193459 | GATTACGTTTGTGATTTTAAGCAGA  | AACTACCAACATTTAAACTTCTCA    |
| AMPL193114 | GGCAAAGGAAATATAATACTGAGAA  | TGTGGTTCAGGCTCTGATTGAGAAA   |
| AMPL193470 | CGAAATTCGTCTTTAAATGACTGTA  | TGGGTTATAACTGTCTAAATCTGGCA  |
| AMPL193471 | GTTCTAGAAAATAATGCATTCTAC   | TTCCATATTCTCCTGTGTGGTCCA    |
| AMPL193500 | GGCCTCCAAAAGCATTATGAATATG  | AGTCTCCCAAATAATTTAAATACCTA  |
| AMPL193473 | CTGACAGCTGTCAGCTTTAATAAGC  | ACAAAGCTCCTTGGAGGAAACCAAT   |
| AMPL193455 | TGAATCAAACAAAAATAAACCTGC   | ACAGGATACATTACCTACAAGAAGC   |
| AMPL193213 | CAACTGTTTATGCTGAAAACAAAA   | CATAATTTCAATTAAGACCACTGAC   |
| AMPL193112 | CATGCCAGCCCATGTAATTTTGAC   | TGTGAGATCCACCTCAAATCCAAAT   |
| AMPL193464 | GAAAAGGCTAAGTGCACAATCTCCT  | CATAACTTGGCAGAGTGGGCTTT     |
| AMPL193501 | ATATCACTAAGGACAAAAACACAAA  | AAGCCAGTCACATGGTAGTTGATGG   |
| AMPL202650 | AAATTCACCTTGCCACCAACACTGA  | TGGATCATATAGAAGGACCTAAACA   |
| AMPL433267 | CGACCAGCCGAATGACCATTATTT   | TCTCCACTCCTTTCAAGTTCTCTT    |
| AMPL433268 | AGAGATCTGAAAAATGATGCATAAT  | CACTGAGTGTCTTACTAGGAAAAA    |
| AMPL433269 | TTCAGGTATGAAAACCCTAAAGCCA  | AACAATTTCTGAAAAGAAAGCCCA    |
| AMPL433270 | GGGAATGAAAAACCAGAGAGGTGAA  | TAAGAATGGGCTTGTGTGCAGCAAC   |
| AMPL433271 | GAAATCCTTACGGTCAAAAATGAGG  | ATGTGAGCTGATGCTGTAGCTGTCC   |
| AMPL321499 | CGAGTCAGTAGTTTTACTTTCAGGT  | ATCCTTACGGTCAAAAATGAGGGGA   |
| AMPL433273 | TGAACAGTCTCCAGAAGTCAAACC   | TGATGTTTTATCTTATATGATGACAG  |
| AMPL433274 | AAGGCTAAAGAGTAGATTAATGATG  | AGTCCAAAAAGTTCTGGAGATTGGT   |
| AMPL433275 | TTGGCAGTTTTCTATCTTAGTCATT  | TCTCTGGATGCAACAACCTAGCAAGA  |
| AMPL433276 | TCTTGCCCTGGACAACCTTATTTCTC | TTCCAGCTTGCCAAAACCTTTTTTT   |
| AMPL433277 | CCTAAGTGCATACATTTTAGGCATA  | TTCTCCAGCAGTGTATTGGGATAGT   |
| AMPL433278 | GCACACAGAACACACAAATATTTGA  | CCAAGAGTTTTGTGAACCTACTGATT  |
| AMPL424    | GGCCGGAGTAAGCTGACAAAAACCG  | TTCTCGCTGACCCTTAAGAGTCCCA   |
| AMPL425    | GGGCAAGGACCTTTCTCTCAGGCAT  | CTAGTTTCAGAAGCTCGCGCCACAA   |
| AMPL476    | ACATAAGGAACAGTTTATGGTTCTA  | AACAGCTTACTGTGAGGATGGGAAC   |
| AMPL418    | CACAGGTTTGCCATAAATCCTAGTT  | GACAGACAAATTTGTGACCCAGAAC   |
| AMPL442    | GATCTTCTACCAGGCTCTTAGCCAA  | TGTAAGAAGAGGTTTTTCAGTTTGC   |
| AMPL429    | AAACTTTGGTGTATGAAACAAACTC  | ATCATCAAGTGATGTTTTAAATGCC   |
| AMPL475    | ACTTAAACGTTTACTGAATTGCCTGT | ACAGGACTAAAATAAAAACAAAGCAA  |
| AMPL426    | ATGACAATTATCAACCTCATCTGCT  | GCAAAGGTATAACGCTATTGTCAA    |
| AMPL439    | TATAGGACCAGGTTTAGAGACTTTC  | GAAAGGTCAATCAACACAGTGAATA   |
| AMPL473    | CATGACTTGCAGCTTCTCTTTGATT  | AGGAAAAGGAAAATGGAAATGGAGAA  |
| AMPL474    | GTGCCAATTA AAAAGAGTAGTTACG | TGTCTGTCACAGAAGCGATAAATCT   |
| AMPL412    | ATGTGGTCTTTGCAGCTATTTACTT  | AGCAGTTCTACACAATTA AAAACTCA |
| AMPL413    | CTTCCACTCTCAAAGGGCTTCTGAT  | CCTGATGTTTTTCCAAATCCTGTTA   |
| AMPL414    | ACTGTTTCTCATTTAATGGCTTCT   | ATCTAATGGATCAGTATCATTTGGT   |
| AMPL415    | CTTTCAGAGGCTTCAGTTTCTTTTT  | AGGCTAGAAATACGTGGCAAAAGAA   |
| AMPL416    | GCAAATGTAAGTGGTGCTTCAAAGG  | TCAGTCATATGACCTGAAAAACTTG   |
| AMPL417    | ACAATCATGTATACAGATGATGCCT  | AACTGGGCTGAACAGTTAATAGTT    |
| AMPL450    | CTTTTTGGATCATTTTCACACTGTC  | AAAGGTAGTGTTTGGGCACAGTGGC   |
| AMPL451    | CATTTTGTATGATTTCTTTGCCTCTA | CATGACAGAGAATCAGCTTCTGGGG   |
| AMPL452    | TCATTAGCTACTTGGAAAGACAAAAT | TAGGTTTGACAGAACATCCTTGGAA   |
| AMPL453    | CTAGAGTCATTTTTATATGCTGCTT  | TCTGAGAAAAGTTCTTCAGAGTCTG   |
| AMPL454    | ACTGAGGCTTGCTCAGTTTCTTTTG  | TGTTCTCCTCTGCAAGAACATAAAC   |
| AMPL455    | AAGTGGTCTTTAAGATAGTCATCTG  | CCAAGGTATTTACAATTTCAACACA   |
| AMPL456    | TTGGATGTACCTCTGCAGAAAGTTT  | CTTCAAATGTACTCTTCTGCAATAT   |

|             |                            |                            |
|-------------|----------------------------|----------------------------|
| AMPL457     | GTAAATAGCAAGTCCGTTTCATCTT  | TCTCAATATCACTAAACAGTTTCAC  |
| AMPL458     | CTTGAGCTTTCGCAACTTCCAAAAA  | ACAGTATCATTTTTACTGAAACAC   |
| AMPL459     | TGGGACACTTCTTTTCAGTATTTTG  | ACAAATCTTCTTTAATCTGAGTGT   |
| AMPL460     | CTTTGCCATTGATGGCTAAAACTG   | GTCTGTTTCCCTATAACTTAGAATG  |
| AMPL461     | TGAATTTTCAATGACTGAATAAGGG  | AGTACCTTGCTCTTTTTCATCAAAA  |
| AMPL462     | AGCTGTTAGACATGCTACTGTTACT  | GTAACAAGTTGCAGGACTTTTTGCT  |
| AMPL463     | CCCTACCTCAAAATTATTACTATTA  | CTTGTTTTTCGGAGAGATGATTTTT  |
| AMPL464     | TCCAGACATATTTTGGTTATGTTGT  | TTAATGGCTGCATTTTTATTTTTG   |
| AMPL465     | AGACTTGCTTGGTACTATCTTCTAT  | ACTCTGAATGTCAGCAAAAAACCTTA |
| AMPL466     | CTCTTATCAACACGAGGAAGTATTT  | CTTGTCTTGCCTTTTGTAAATGAAGC |
| AMPL467     | GAACATCAGAAAAAGTTTCAGTTTT  | TGTCTAGACGTAGGTGAATAGTGAA  |
| AMPL92543   | ACCAAGTCTACTGAATAAACACTTT  | TTTTACGTTTTTTAGGTGAAGCCTG  |
| AMPL422     | TTGAAGCCTTTAAGGATTTTTCTTG  | TGCTACCAGATACCACAGATAAGCT  |
| AMPL95      | AAAGAGGTCCTTGATTAGGCACAGT  | AATAAGTTTCTTTTGATTGAGGGTT  |
| AMPL444     | CGGGAAGTGTTAACTTCTTAACGTT  | TGATTACAAAATTGATAATGACTAT  |
| AMPL92544   | CACACTGTTCAACTCTGTGAAAATG  | TCATTTGCTACATGGTGATACTATT  |
| AMPL92545   | AACCATCAGGACATTATTTAACAC   | TAAAAGGTGGAACAAAGACTTTGGT  |
| AMPL91517   | AAAATTACACTCTGTCAAAAAGCC   | TGGCATTCTGAAGACTTGTAATTA   |
| AMPL477     | CTCTGCATTTTTGCTGTTAATTTTT  | TGCCATAGGAAGGTAAGTGTGAGGAT |
| AMPL91528   | AGGGATGAGGGAATACATAAAAAGTT | AGAAAACGCATACGTATACAGCTAC  |
| AMPL471     | CTACACAGAAAACCTTAACCATACTG | ACCACATAGGATGATACTGAATTA   |
| AMPL92541   | TAACAGCATACCACCCTGTGAAG    | CCACTGTTTTAAACAAGTCACTGAA  |
| AMPL92542   | CAAAAACCTTAACTGTCTGAAGAAT  | CCACTTTTTGGGTATCTGCACTACT  |
| AMPL427     | AAAGAATCCAAGTTTGGTATACCAG  | GCTACAAGTCTTAATGCTATTTAA   |
| AMPL428     | AGGTGTGGTGGCTCAGCTACTTGAG  | AGTACTGTTAGCAGAAAATCTGGACA |
| AMPL359     | CCTCTCTTTCATTGCGAAATATGTA  | GTTAATTGTATCAGGCCAGGCACAG  |
| AMPL472     | GCTATTCTTTGTCTAACACCAAAAA  | ATGTCTTCTCCATCCACTGTAATAA  |
| AMPL430     | AGCATTCAACATACTCCTTCTCTGT  | ACACCCAAAGAAGGGAGATTTAAAG  |
| AMPL446     | CATTTGCCTGTGATTATTCAAGGCT  | ACCAACTACATTACAGATGGCTAAT  |
| AMPL448     | AGTAGTGGATTTTGCCTCTCTGATA  | TTCACTGAAATAACCCTGTGACCAT  |
| AMPL419     | AGATTCATAAACTAACAAGCACTT   | GGCATTAGTAGTGGATTTTGCCTCT  |
| AMPL438     | TCACTAGTTAGCTAGCAAAATTTGCC | TACCGGTAGTTGTTGATTAAGGATT  |
| AMPL423     | GTCTATCCAAAACCTTATTGCCAGT  | TGTGCAAGATTTCTGGAGATAAATT  |
| AMPL92546   | TTCTTGATACTGGACTGTCAAAAT   | TTCGTCTGACAAAATAGACGAAAGGG |
| AMPL440     | AACAGAATATACGATGGCCTCCATA  | TGTCAAACATGCCGATGCAAAATTA  |
| AMPL431     | CAAATGGGACTAACAGGTGGAGGTA  | AGGTTAGGTGATTTTCAGTTCACATT |
| AMPL432     | TCAGAGATGTAGTACAACGTCGTTT  | CTCAAGAAATCCAAGGCTCTTCTCT  |
| AMPL433     | AGCAAAGTATACCAATACGGAATC   | AATCTTCTGAACTGGTGGGAGCAGT  |
| AMPL434     | CTCATTCATTTAATGACACAATCT   | TTTTTGCCCGATACACAAACGCTGA  |
| AMPL435     | TATTTCATAGTGAGTTACCTCTAAA  | AGCTCAGCCAAAGATGTTTTTCTTG  |
| AMPL270716  | CCACTCTCATATTCATCCTGACTT   | TCTGCATCAAAAATAACTGTACTAAG |
| AMPL1139776 | TTGTGGTAAGTTTTAAAGGGCATAG  | GGAACTATAGCAGAACCAACATATT  |
| AMPL1139772 | GATTTTTGTAATTTCCACATTTGT   | CATGCATCTTTCATGCCAGTGCTGC  |
| AMPL1139773 | AACATTTGGTCTTTTGTGAAATGGTC | TAAAGGTGTACATAAAAGCTTCAAAT |
| AMPL89490   | TTGGGAACATGGTTTTGACCTTTTT  | CTCATTTGCTGGCTGGACAAAAAGA  |
| AMPL91681   | GTCATTGCTTTAATTGTTTGGTTTT  | TGTGTCACTTAGAAGAATGGAAAAC  |
| AMPL91680   | GTTTTTCCCTGGTCACCTCCTAAG   | TGAAAATAAGTGTGGTACAGTGAT   |
| AMPL91679   | GTTTAGTATACACGTTTTCTGGGTT  | ACAGGGTGTGTGGAAGATTAATA    |
| AMPL91687   | TAAAAGGTTACTCCTCACATCACCC  | ACACTAGGTTATGACATAGAAGCAG  |
| AMPL91688   | TTCAAATGATGAAAATTATCCTTGT  | AACCTAGGCTTGAGTCTTGAAGAA   |
| AMPL91696   | TCACTTGCATACTTATGCTTTGCA   | AAGGCAGAACAGAGATGAGGTTTTT  |
| AMPL91685   | GTGAAACAGTTTGCATTTGGAGCTT  | CAGATTCAGAAAAACAGATTTGGAT  |
| AMPL91682   | CTACAGAAGTTGCTGGACGAACTTG  | ATTGGGCCTTCCACGTTTAAAGAATG |
| AMPL91683   | TCTTAAAGAGGGAAAGCTGTATTTTT | AACTTGCTCATTTGAAAGACTCAGT  |
| AMPL91684   | TCTGTTTTGTTGGGTTTTGTTACTA  | GAGTCTAAACGCATGGATACAGAA   |
| AMPL91690   | AACCAAGTTCAAGAACCTCTCAGAA  | CTTCTTTTCTAAAAAGTGACAGGG   |
| AMPL91691   | AGTGAGATTCTAAGTCAACCTAAGA  | TAACTAAAGTCAGCTCTCCCGCTGG  |
| AMPL91692   | GAACCTACTACTCACGACCTAAAAA  | GAAGCAACCTCTCCTTTTCTGCAG   |
| AMPL91693   | ACAGGAAGAAATCAGTAGCAAAAAAT | ACTTCACCTGTAAGTTTGGAGGCAC  |
| AMPL91694   | GCCTGAGTCCTTTAACCTGGAGAT   | ACCAGTAACTGAAATAAGAAGACTAC |
| AMPL91695   | AATGAAATGCTACTGATTTCTTCTT  | ATTACCTATACAAAGAACAGACTGAC |
| AMPL91686   | AGGTAAGTGAATCGTATTCTCAAAT  | TGTGAAGATAATGACTAGCAATAGA  |
| AMPL91678   | CAAAAGTAGATTGTTATGGACCAGT  | TTGTCTCCTCTAGCGTGCCCAAAGA  |
| AMPL1139774 | CGACGGCTGCTTTTTCTGTTCTGTC  | TGTATCGACACCTTGTCTCTCCCC   |
| AMPL1139775 | GGTGGCCCACTGGGACTCATCGACA  | TGTGAGGAGAAGGAAAAGGTGCCGG  |
| AMPL1140909 | CTGGAGTCTGAACTGACTCCGCAA   | ACACTTGGCTGAGTCTTTTGTFTT   |
| AMPL1140910 | CCCGAACTTCTTGGAAGAAGGGAA   | TTTGAGTCCGACGCCACTGAGAG    |

AMPL193106 GAACGTGTAGTCTCTCGGCGTCAAAG AGTCTCCTTTCTCATTTTATTGGAG  
AMPL193107 CCCCAAATCTGCGTAAATTCOAAGG GAAAGGTAGATGGAACCGGTGACT  
AMPL193101 TACCAAGGCTGAGAAACCTGGATTA TCCTTCTCCAAAGAGCGAACTTGTG  
AMPL193094 GAAGGATCCCAACACTGGGTCTTTT TTCTGTGGGCAGTGTACAGTTTGAA  
AMPL193100 TCCTCATGTGTTTCAGAGCCTCTGAT AATCCCTCCCAGAGAAAACAGAGAAC  
AMPL193110 AACCTTTGGGCTTGGACAACACTTT TGACTTTTCTCACACATGTGCTGCT  
AMPL193104 ACTGACAACTGGCCTAGCAGGATTT TTCTGCCCTGAGGGATAAAGGAGGG  
AMPL193103 CTCTAGTCTGGAGAGAGTTTTCAAAA TTAACCATGTGCTTCATGCCAGCCT  
AMPL1140908 GTCCACTACAATCTGGGAAAAGTCAC CAAGACTGCTAGCAGAGCTGAGTCT  
AMPL193092 ACTGCTACGTGTAGAATGTACTGCT TCAACAAGCAATTCACTCAAATTCT  
AMPL193093 ATGACAAAATGCCATGAAGTACATA AAATCCAAGCCCTAGAGAGACAGAAA  
AMPL193102 AAAAAAGAAATGAACTCTTCCCTCCAA TTTTTATTTTGAAAACCAACAATAG  
AMPL193108 TGTCCAGTAGCAACTGGAGAACCT TATTGCCTGCCTGTTGTTCCCTAG  
AMPL193109 AGTTGAGAAGGAAAATTGAAAGGTG CACAGAAAATGTGGCAGCTTGCCAA  
AMPL193098 TTTCCAGGAAATAAACCTCCTCCAT AAAAGCTCATTCCAGAATAAAAATTGC  
AMPL193099 CCAAAGTGATTAGAGCTGTTTCAA ACTAGCTGCCTTCAATACACTTGAA  
AMPL193097 AGCTGAAAACATAGTAAAGGAAAAGA ATGCCTTCACTGCCAACTGTATGAT  
AMPL1140901 CTCAAGGGAAGGGAGCTGAAAAACC TTAGTGAAAGGAAGGGCACACCTGT  
AMPL1140902 ATGCTAAAGTTGTTCTTCTGGAATA ATTTCTGCATTTCCAGCACATGGG  
AMPL323542 AAGGCAGAGGGACACACCAGTGTAG GTATCTTTTGGACATCACCACCATG  
AMPL1140903 TGGGCGATGGAGCGAAACTGTCTCT ACACACCAGTGTAGTAATGAGCAGA  
AMPL1140904 CTTGGGCAAAGCAACTGAAATTCAGG TGGAGCGAAACTGTCTCTTAAAAAA  
AMPL1140905 TCTTGCTTCAGAGCTAAAATAAACAT ATATTA AACATGGAGCTGGGCAC  
AMPL1140906 TGGAATTGGGCAAATGTGTTACAGCT CTTACTCAGAACAAGTCACTGGATA  
AMPL1140907 AGTGACATTCTTACACAGA ACTAT TTCTGTAGACATCATCAAAGCAGG  
AMPL323549 TCTTTTCTTACTGACTGGAAATGTGG CTTGAACTGCCGAAAAATCAAGACA  
AMPL328876 AACTTTTGCATGTTTTGTAGAGATG AGTCTGCAATGAGTGTGGGCTGGGG  
AMPL275183 TTATGCTCAGGGTCAATTTCTTTTT CAACATCTTTTACATTCTGCAAGCA  
AMPL275185 CCATATCTGTGAAATGCTGGCATT CCAAGACTTGTTTTATGCTCAGGGT  
AMPL275186 TTTGAACCTTGCTTGCAATAGGTT ACAGAGTGCATTGTGAGGGTTAATG  
AMPL328877 TTCAAAGCATTGGTCAGGAAAAGG AGGACTTCCATTGTCTTTGTCCCG  
AMPL91542 TTGCTTTTGTACCGTCATAAAGTCA TTTTAGTCTTCTCCGGTTGAATCC  
AMPL92563 GTTGTAGCTAACTA ACTTCAGAACA TCTAAGGAACATCATAGCTTAGCCT  
AMPL91545 AGGAAGAGAATCTCCGCAAGAAAGG CAAAAGACAATGGCTCCTGGTTGTAG  
AMPL91541 GGACAAGGGTGGTTGGGAGTAGATG TTTCTTGCCTCTTTCTAGCACTG  
AMPL91543 ACTGGCCTCATCTTGGGCTGTGTT TACCTGGAGCTGGAGCTTAGGCTCC  
AMPL91544 ATCTACAAGCAGTCACAGCACATGA TTCTCCTGTGCTTATTTGACCTCC  
AMPL275179 TCTCCTTCTCTTCTTACAGTACTC ACAGAAAACACTTTTTCGACATAGTGT  
AMPL267718 AAAGAAAAGCTCCTGAGGTGTAGAC ACAAGATGTTTTGCCAACTGGCCAA  
AMPL275190 TCCCAGCACTCTCAAAGAGGCCAAG CTAGCTCGCTAGTGGGTGTCAGGAG  
AMPL91540 ACGATATTGAACAATGGTTCAGTGA TTCACCCTTTGGCTTCTCTGAGT  
AMPL328874 TTTCTGCTCTTGTCTTTCAGACTTC CTTCTGTCCCTTCCCAGAAAACCTA  
AMPL328875 GACCCAGGGTTGGAAGTGTCTCATG GTTCTGGTAAGGACAAGGGTTGGGC  
AMPL328878 CCAAACCTCCATTTCTTTGCTTCTC ATTTTCAGCTCGGGAAAATCGCTGG  
AMPL827588 TTTGCTTGTGAAGGAAGAAAAAGT CCAAAAACAATTGTTGCAAGGTCAG  
AMPL827589 GAAGAGATTTCTAAAAGTCTGAGAT ACCCATTATCCAGGACTGTTTATAG  
AMPL574036 GAGGCAGGTATTAGAAATGAAAAGG GAACTAGAAGAGATTTCTAAAAGT  
AMPL574037 TTCTTAAAACCTGTGTTTCAAAA ACTTGAAACCTGGGCATGGTGGCTC  
AMPL827590 CTACTGTCCTGGCTACTAAAATATTT AGACCCTTCAATGGAAGGAGAGTGC  
AMPL934428 TCCAGGAGAATGAATTGACACTAAT CCCTTAAAGATTTTCTGCTTGAAGT  
AMPL3006 ATGATGAAGTGACAGTTCAGTAGT AAAGTAATACATGAAGTGTTCAT  
AMPL2996 TAAGACCATTGTCTTTGGAGCAGA ACTCCATCTGTAAAGGATGGGTAAG  
AMPL2994 CTGGGAAGTAGCAGCAGAAATCATC TCTCCAAAACAAAACAGCACCTAAAT  
AMPL2993 GCGCCTGGCCTGAATGCCTTAAATA TTCCATCCCAACCACATAAATAAGT  
AMPL3020 CTGCTACAAGCCTTATTAAGGGCT CAAGAATTATGCAGGCTGCACTGT  
AMPL3022 TGTTTTAGCCTCTGATTCTGTAC TGAGTCTGAGTTACCAAAAAGGTCTT  
AMPL2999 AATAGTTCCAGGACACGTGTAGAAC ATAAAACCACATGAGGCGAGGCACG  
AMPL2990 CAGAATTGACAGCTTCAACAGAAA AGGACTTTCGAATTGGAATTTTCT  
AMPL2991 TGTAATTCAACATTCATCGTTGTGT GAATGTCCATGGTGGTGTCTGGCCT  
AMPL92530 TTACTTGCCAAGGCAAGATCTAGGT GTATTATTTAGGCCAGGCATAGTG  
AMPL92531 ATGATTTGTCTTTTCAAAATGGTG TGTGTATTGGAACAACACTTTGA  
AMPL2998 AATTTGTGTATCATAGATTGATGCT TGCATACAGGCATTATACACTTTT  
AMPL2989 CTTAACTTGTTTACAGCGATGCCAA TGTATCTGAGCCTTCCCTCTGCCTT  
AMPL3004 AGGTGATTTCAATTCCTGTGCTAAA AGAGTAAGGACCTAGCTCCAACATT  
AMPL3007 CCAAAGCAAGGAATTTAATCATTTT TTGTGGTTCATTGTCTCCTTAAATT  
AMPL3008 ACAAATGTTCTGCTAGCTTGT TTT GCTTCTTAACTTGAACATGTCC  
AMPL3009 AAAGGAGAGCTTAGCAGGAGTCTA AGTGAATTGGAAGACTTGACTGCAA

|             |                             |                             |
|-------------|-----------------------------|-----------------------------|
| AMPL3010    | ATTGAATGCTATGCTTAGATTAGGG   | CATACACATTTGGCTCAGGGTTACC   |
| AMPL3011    | TTTTCCCATCAAGTCATTTGTTAAA   | TGAGGTCTATAAACAAAGTCTTCCT   |
| AMPL3012    | CCTTAAAGAAACAAAGTCCAAAAGT   | GAAAAATCTGCTAGAGGAAAACTTT   |
| AMPL3013    | TTAGCACTCTAGGGAAGGCAAAAAAC  | GTGAAACAAAAGGAAGAAAATCAAGG  |
| AMPL3014    | AAATGAACAGACAAGTAAAAGACAT   | AATGTGTGAGTCAGTGTGCAGCATT   |
| AMPL3015    | GTATAAGCAATATGGAACCTCGAATT  | TTTCCCAGAGCTGAAGTTAACAAAT   |
| AMPL3016    | ACTGAGCCACAGATAATACAAGAGC   | ATTCAAAAGCACCTAAAAAGAATAG   |
| AMPL3017    | TAGGTTCTGATGACTCACATGATGG   | AAATTAAGCGTAAAAGGAGACCTA    |
| AMPL3018    | TGAATTCTGTAATAAAAGCAAACAG   | CAAATGCCAAAGTAGCTGATGTATT   |
| AMPL3019    | CCAAGGTGTATGAAGTATGTATTTT   | AAGGAGCCAACATAACAGATGGGCT   |
| AMPL3003    | TAAAGGAGAGAGCAGCTTTCACATA   | GTTAGAGTATCATTCTCTGTCAAAAT  |
| AMPL3021    | TAACCACTTCTCTGTATTACATACT   | TGTTATATAGGTTAAACACACGACTT  |
| AMPL3023    | TTTCCAGGCATCATACATGTTAGCT   | GGAAAGTGAATTTTATGAGCCCTATG  |
| AMPL3000    | GCCAAAAGACTTCTACAGAGTGAAC   | ACCATTTTCATTTATTCTGGCAACA   |
| AMPL92532   | GGGTTTCTCTTGGTTTCTTTGATTA   | TCCTTGGTAAAACCATTTGTTTTCT   |
| AMPL3002    | GAGGTTTTCTACTGTTGCTGCATCT   | ATTACTCCCACTGGTCTCACACCTT   |
| AMPL2988    | TAAATGGCTCTTAAGGGCAGTTGT    | CCTGAAAGTTTTATGGGACATCTGC   |
| AMPL2997    | CTGACACAGCAGACATTTAATAAAT   | TCCAACCTCCATTTCACTTTCTCA    |
| AMPL2987    | TTGTCAATTAGTTCTTTGGTTTGTAT  | AAGAAAAAGACATGTCTAGTAAAGATT |
| AMPL827587  | TGCTCTGGGTAAAGGTAGTAGAGTC   | TAAAAACGTCCGGCTGGTCATGAGGT  |
| AMPL574545  | TGTCCTCCCATCCTCTGATTTGTAC   | ATTTCCGAAGCTGACAGATGGGTAT   |
| AMPL92975   | TCCGTCTCTTTCCTTTACGTCATC    | ATTCTGAGAGGCTGCTGCTTACGGG   |
| AMPL193549  | CAGGAGTCGTACCTTTGCTAAGCT    | CCAAAATCCCATTAGAGATTCCTC    |
| AMPL193550  | GAGGAAGCAGAATCTAACGGAGACT   | ACCTCTAGGAGTCTCTCAGCAGTCT   |
| AMPL1338720 | ATTTCTGTTGTTTTTATTAAAGGGCA  | TAGGAGTGGAGAAACATAAAAAATGC  |
| AMPL1338721 | CCTTATGACTGCAGTACAATTTGCA   | AGAATATCATCTAGTGTGAACAGA    |
| AMPL193556  | AGGTCTCAGATGGGCACAAATGCAA   | GGTAGTGTTTTTGAACTCCAGATAA   |
| AMPL193548  | TTGATTTTATGCTACTGTACTGGTT   | TGTATTGGCAATTGTAGAAAAACAA   |
| AMPL193554  | AACGCTATTTTGACATTTCTAGACA   | ATGCTCTCTCTCCAAGAGAGCAG     |
| AMPL115344  | AGCGTATAGTACTCAATGAGAATCA   | ATCAAGTAGACCAGTCTGGCCAAGA   |
| AMPL115331  | CTAGCTCTAAGAAACCTGTAAGTGT   | TCTCAGAACGCCTCTGATCAAAAT    |
| AMPL193555  | TGTTCTAAGCATCAAAAGCTGTCCT   | AAATACACCCTCAAATACAACTTA    |
| AMPL516562  | TGTTTGCAATGAACATGCAGAAAGTA  | TACTTTATTCTAGGGCCAGGCGCAG   |
| AMPL1338722 | TTTAGAAAACTTTCACAGAATCAT    | TCTAAATCCCTGAGGCTGAAAGATA   |
| AMPL1338725 | ACAGGCTGCAAACCAGGAAAACACTAC | TCATGAAATCAAAGCACCTGTTGTC   |
| AMPL1338726 | TGGCACATTGCAAGTTATTCATTAT   | AGGGCTTTATTCTTGGAAATAAAGGT  |
| AMPL1338727 | CTTCCAAAATTTAATTCTCCCTGA    | TGAATCATATATCTGGAGTGCACCC   |
| AMPL1338728 | CTAGCTAGATATGTTTTTGTGTTGTT  | TTCCAAAATTTAATTCTCCCTGAAG   |
| AMPL1338729 | GGACTTTTAAAAATTACCTTTAGGGC  | AGAATTGGTAAACTACATGAGAAAA   |
| AMPL1338730 | CCTATGAGACCTGATGATTTTATAA   | AAATTACCTTTAGGGCCAGGCGCGG   |
| AMPL1338731 | TGAGAATCTATAAAGGAATGTCTGT   | TGCTTCACTCTCATTCTCTCTCTC    |
| AMPL1338732 | ATAGTAGGGTAGTGAAACGATAAAA   | GTCGATTTTCATTTGCTTTTGTCC    |
| AMPL1338733 | GTCTTTGCTTCCATTTTGAGACATT   | AGACAAGAGACTTGGGCTCTACACC   |
| AMPL1338734 | TCTCTGACATCATTTCCAAAAATACA  | AGCCTGTTTCTATAGCATTGATGT    |
| AMPL1338735 | ATTTATAGCTGCAGCTAAAATATGT   | TTTTTAAGAAACATCTGTTATTCAC   |
| AMPL1338736 | AAACATGTCATAAAACAAATTGACGT  | ACAGTAATCCTTTCTGTGAATTTG    |
| AMPL1338737 | TAGATTTTACCTCAAATCAGTCCAA   | TTATTTAGCTTCACCATCATTGTGG   |
| AMPL1338738 | CTGCCCTTCTCTGCCTCCCTAAGTT   | AGATCACCATTGTTCTTGAAGGTT    |
| AMPL193671  | ACCTAGCTGAAACTGATAGAGGAAA   | GTCATCATGCTTATGTTAAACTCTG   |
| AMPL193672  | GAATCCTCAAATCTGACAGTAAACA   | ACAATTCAGATTGCATTTTAGCTAA   |
| AMPL193673  | TATGTTAGCTAGGAGCAGAAAGTTA   | TCATGCCCTCAATCAGAAACCATTA   |
| AMPL193667  | TCACCAGAAAATTTTGTGGAAGATG   | CTAACTGGCTTTGCCACTTACTAGC   |
| AMPL193668  | AAAAAGCAAGTGTATTACCTTAGCA   | TGTGTCCAGGAACTACAGTGCCTA    |
| AMPL193662  | GGATAGCTTCTGTAACCTTTCTGAT   | ACATGAGCTCTACTATCTTATTAAG   |
| AMPL193669  | GCCGTCAGTGGTATGAAATTCAAGC   | TGAATAGCACACAAAGATGCTCAGT   |
| AMPL193670  | TTAGGTAATTTAAGGAATGTGAAGC   | TAAACCAGGCCCTTGGTAGGTAAGT   |
| AMPL193648  | CATAACAATAGGAATTCCTTTTCCA   | ACTGTTAGGGTAATCTGTGATAAGT   |
| AMPL193649  | GCTACCCTTTTGCATATAAATGTAA   | TCTACAGGTAGGCCATCAAAAACCTT  |
| AMPL193663  | TATGACGCAATCAAATACAAAGGAG   | AGCCAAATGAGACCTATATTCTGAT   |
| AMPL115910  | TTAAGTTTGTGTTAGCTAGACACACA  | TGGAAATTTTTCATGGTCCGGTGAA   |
| AMPL193658  | CTAATTTCCATGCCCTTTTTCAGGCA  | TTCTAGGGTAGAGGCAACAAGGTA    |
| AMPL193652  | GTTGTTTTCTTTTAGGCCTTTTTCAG  | ACTTGGGATGCAAAAAGGCTGATTT   |
| AMPL193674  | AGCTCTTTCAAATGAGTTTAAATGT   | ACCAGCATTTTAAATAAATGTGGTTG  |
| AMPL193653  | AATTTCAATGCATGTTTTGTTGGGT   | TTGGGTGAGTAAATAGGAGAATTGA   |
| AMPL193657  | CGCATGACAATAATGATGATTCTCT   | TCCAGATTAATCTAGTGAGTAACC    |
| AMPL193650  | GAGCTGTGTGCTGTAGCCTCATTA    | GGATATTGAACCAGAAACTAAACGT   |
| AMPL193651  | TTGTTAAATCTATTTTGCCAAATGT   | TGTCTATTAGTGTATTTGTGCTGCC   |

AMPL193666 GTTCCTCAAATTCTGAGATAAGCTT TCCTACTCATGGAGATGTAAATGTT  
AMPL193664 TCGGTAACFTCAACAGAAATGAGAA ATCCTGCTACCAAAAATAGTCAAAC  
AMPL193665 CCATGTGAGGTTTGATAACGTTTTT TGCTAGATGGGAAAAACGTGAGTAA  
AMPL193660 AAATACATAGAGCTGTTTTGGCCTT TCTCTGTACTAATGTGTGAGATGG  
AMPL193659 TAAGCCTTACATCCTGGTTCCAGTT TTGGGTCATGTGACAGCCATAAATT  
AMPL193654 AATGGCACTTCATCAACTGTCAAG AAGGCAAGGCAAAAATAAATGATTTT  
AMPL193655 TGTAGAGAATGATTGATGTTTATTT TTTGCCTGGGTCAGTTGATATCTGT  
AMPL193656 TCACTTTTCCTTGCTGTTCTATTTA TATCCAGACTGGTTCAGCCATGCTG  
AMPL193661 GTTTTGGTTCTCTGGTTTTCTTTGT TGATTGCAGCTAAACTGTATATATC  
AMPL1338723 TTATTTGCTCTCAGAAGTCGGTTTT TTAGACTATTGTTGCCACAGCCGG  
AMPL1338724 ACTTCCATTGGATGCCGAAGTTCTC TTCAGTGAATCGGAGCTCAGAGCGT  
AMPL576709 CGCCGCCCATCTTGTTTACTCC CGTAGGTACGGGTGCCAACGGCCT  
AMPL576710 CCCTTCTCCAAAATTTTACAAAGAA GGACAAGTATGAACACGGCCGAGCG  
AMPL576711 CACCTCCTTACCTTGCCGTAAGAG CCAAAAAGGAAGGGAAAAACCTTCT  
AMPL193005 CAGGGTGTTAAGAGGAAGTAAGGGA CATCAGGTAATGCGGATGAGCTTG  
AMPL193011 AGCCATTGCCACAATGGCTGACTTC ATCTCCCTGTGGAAGTGGCGTACCT  
AMPL193012 GCAGTGTGGCTCACGGAAAGGAGC GTCCCAGGAGGAAGGAGCCTACGGG  
AMPL193013 CGGCTTGATGTCTTGTGCACAATG AAAGTCTTGCTGGAACAGCAGGCC  
AMPL193002 GACCCAGCCGACCAGATGTCCACC CTGACAGAAGTACCTGCGGGCAGCA  
AMPL96363 TGAGTTACATTTCCATAAAGTAAGC TTGAAGCCGGAGAAGGTGTCCAGGC  
AMPL193003 ACCCCCAACCCTACATTTCTGCACA TTCACCACCTTCCACTAGTGGAGGC  
AMPL193009 CTGCCGGATCTGCCGGATGGAGAAC TAGGAAGTGCAGCAGGACAACCCTG  
AMPL193010 GGACGGACGCATGTCTCACTCAGA TTCGTACTCAAGCATCCCTGAGGAG  
AMPL193006 AAGTCTGAGTGTAGATGATGTCAT AGAAGCTCAGCCATGTCTCTAGGA  
AMPL3119 GGGCAGAAGCTGTCTTGTGTCAGA AAGAGGTCCTCGTCTCGTCCGCGC  
AMPL193007 CCGCCTCTGTGCCGTTACATACAC ACGTCTGTTGCACCTGCCATGGCCG  
AMPL193008 CGTGACGGTACCATGACTGACTAG TGTCCATTGTGACTGGCCTCCTCTT  
AMPL576695 GGGGCGTGGTCGGCACAGAAGCATG TGTAACCTCAGGCGGTGGCCCCAAA  
AMPL576696 GTAGTCTCCACATAAAGTGCATGGA AGGAAGACGGAAGAGGTGAGCCTGG  
AMPL576697 CAGCTCAAATCCACCTTTTATTTTT CTGCGAAGTCAACAAGCCGCGTGCA  
AMPL576698 GCGTTTCTCGTGTTTTTCTTTCTG AAAAAAGAAAATGGAACCAACCAAAC  
AMPL576699 GACCTCCGAGACCGTTTACTCACT TATTGACCGCACACTCTGCTGCT  
AMPL1140898 GGAACTTTGATAATCTTAAAGAAGC ATAATCGGTTCTTTAGTTGAATGGC  
AMPL193569 GATGATTCTTGACGGACATTTTTTC TAACTTGATTGCTCCAGCACCCCTT  
AMPL193570 GCTGACTCCGTGATGATCTCAGACC AGGATGGGTTACAACCTGTTTTATT  
AMPL193563 GGGATTACAAGCCTAAGGCATTGTG TATGTGCTGTGGTGGGAGTTTCTTC  
AMPL193558 CTTCTTGACTGGCAGACTATGTTA ACAAATGTGTCTTGTCTGTGTGCC  
AMPL193573 TGGAGAATATGGTTGTGTGTATCAC TCTGACCCTTCACTGTTACCAATT  
AMPL193571 ATAAAAATGTCAACTGTTTGCTTGT GGCAAAAATGTCCTACTCCTTTCAC  
AMPL193567 GTTGGCTAGATTCTGTCTGCCTTCT TAGGCTTGCCTTTCTCATCTGGGG  
AMPL193561 TAAGTAGAGCTGGGTTTGGAACTCA AATAAAGATAAATATGGCCAGGTGT  
AMPL193562 TCTGCAAACAGGGACAATGGAAAGG TGCTTAGATGGATGAATTTGTGAGT  
AMPL193559 TTACAATATGTATTAGCCACTAAT GTGATTGGTGGTTTCTCATTCTGA  
AMPL321599 TCTTCCCTGGGCAAGAGAGTAAGAA AGCTGATTTTCAAAAATACGGCGGG  
AMPL193572 ACCCATGTATCTAGGAGAGCTGGTA AAGATGAGTAAGTTGCTGGGCGTGG  
AMPL193568 TTGATAATTCTGATTGCCCTTCTTAG CAAAATGTTCTCTATTTTAGGAAGT  
AMPL193557 ACAGAGTCTGGCCATGTTACCAAT TCTCCTCTGATATCTGAAGACTAAG  
AMPL193565 GCTCCTTAGAGACAGTGTCCACTCA GTACATGTCACAGGATGGGAGCAGG  
AMPL1140900 AGTCTTGTGCCTTGAAACTACCTT CTATTCTGAGGACCAAGAACCCTGA  
AMPL1140899 ACCAGACTAATGTTGCTGATTGGCT AGCTTCGCTTTGTCTGTAGTTTTGA  
AMPL193009 CTGCCGGATCTGCCGGATGGAGAAC TAGGAAGTGCAGCAGGACAACCCTG  
AMPL193010 GGACGGACGCATGTCTCACTCAGA TTCGTACTCAAGCATCCCTGAGGAG  
AMPL193006 AAGTCTGAGTGTAGATGATGTCAT AGAAGCTCAGCCATGTCTCTAGGA  
AMPL3119 GGGCAGAAGCTGTCTTGTGTCAGA AAGAGGTCCTCGTCTCGTCCGCGC  
AMPL193007 CCGCCTCTGTGCCGTTACATACAC ACGTCTGTTGCACCTGCCATGGCCG  
AMPL193008 CGTGACGGTACCATGACTGACTAG TGTCCATTGTGACTGGCCTCCTCTT  
AMPL576695 GGGGCGTGGTCGGCACAGAAGCATG TGTAACCTCAGGCGGTGGCCCCAAA  
AMPL576696 GTAGTCTCCACATAAAGTGCATGGA AGGAAGACGGAAGAGGTGAGCCTGG  
AMPL576697 CAGCTCAAATCCACCTTTTATTTTT CTGCGAAGTCAACAAGCCGCGTGCA  
AMPL576698 GCGTTTCTCGTGTTTTTCTTTCTG AAAAAAGAAAATGGAACCAACCAAAC  
AMPL576699 GACCTCCGAGACCGTTTACTCACT TATTGACCGCACACTCTGCTGCT  
AMPL1140898 GGAACTTTGATAATCTTAAAGAAGC ATAATCGGTTCTTTAGTTGAATGGC  
AMPL193569 GATGATTCTTGACGGACATTTTTTC TAACTTGATTGCTCCAGCACCCCTT  
AMPL193570 GCTGACTCCGTGATGATCTCAGACC AGGATGGGTTACAACCTGTTTTATT  
AMPL193563 GGGATTACAAGCCTAAGGCATTGTG TATGTGCTGTGGTGGGAGTTTCTTC  
AMPL193558 CTTCTTGACTGGCAGACTATGTTA ACAAATGTGTCTTGTCTGTGTGCC  
AMPL193573 TGGAGAATATGGTTGTGTGTATCAC TCTGACCCTTCACTGTTACCAATT

|             |                           |                           |
|-------------|---------------------------|---------------------------|
| AMPL193571  | ATAAAAATGTCAACTGTTTGCTTGT | GGCAAAAATGTCCTACTCCTTTCAC |
| AMPL193567  | GTTGGCTAGATTCTGTCTGCCTTCT | TAGGCTTGCCTTCTCATCCTGGGG  |
| AMPL193561  | TAAGTAGAGCTGGGTTTGAACTCA  | AATAAAGATAATATTGCCAGGTGT  |
| AMPL193562  | TCTGCAAACAGGGACAATGGAAAGG | TGCTTAGATGGATGAATTTGTGAGT |
| AMPL193559  | TTACAATATGTATTAGCCCACTAAT | GTGATTGGTGGTTTCTCATTCTGA  |
| AMPL321599  | TCTCCCTGGGCAAGAGAGTAAGAA  | AGCTGATTTTCAAAAATACGGCGGG |
| AMPL193572  | ACCCATGTATCTAGGAGAGCTGGTA | AAGATGAGTAAGTTGCTGGGCGTGG |
| AMPL193568  | TTGATAATTCTGATTGCCTTCTTAG | CAAAATGTTCTCTATTTTAGGAAGT |
| AMPL193557  | ACAGAGTCTGGCCATGTTACCCAAT | TCTCCTCTGATATCTGAAGACTAAG |
| AMPL193565  | GCTCCTTAGAGACAGTGTCCACTCA | GTACATGTCACAGGATGGGAGCAGG |
| AMPL1140900 | AGTCTTGTGCCTTGAACTCACCTT  | CTATTCCTGAGGACCAAGAACCTGA |
| AMPL1140899 | ACCAGACTAATGTTGCTGATTGGCT | AGCTTCGCTTGTCTGTAGTTTGA   |
